# Supplementary material for: Initial SEI formation in LiBOB-, LiDFOB- and LiBF4-containing PEO electrolytes
Source: Royal Society of Chemistry journal article supplement (doi:10.1039/d3ta07175h), 2024-01-01
Supplement: d3ta07175h1.pdf [file d3ta07175h1.pdf]

**Tables and figures for Supplementary Information**

**Table S1.** Compositions of four electrolyte mixture systems in the AIMD calculations.

| <b>Systems</b>              | <b># of PEO</b> | <b># of Li Salt</b> | <b>wt%</b> | <b>Density (g/mL)</b> |
|-----------------------------|-----------------|---------------------|------------|-----------------------|
| <b>PEO:LiDFOB</b>           | 8               | 5                   | 23.4       | 1.19                  |
| <b>PEO:LiBOB</b>            | 8               | 4                   | 24.8       | 1.21                  |
| <b>PEO:LiBF<sub>4</sub></b> | 8               | 8                   | 24.2       | 1.20                  |

**Table S2. Calculated binding energy of Li-ion on PEO polymer chain and salt anions**

| <b>Systems</b>                    | <b>Binding type</b>                                 | <b>Binding energy (eV)</b> |
|-----------------------------------|-----------------------------------------------------|----------------------------|
| <b>PEO</b>                        | Coiled                                              | -3.00                      |
|                                   | Anchored                                            | -0.86                      |
| <b>BF<sub>4</sub><sup>-</sup></b> | F...Li...F                                          | -1.86                      |
| <b>BOB</b>                        | O <sub>carbonyl</sub> ...Li...O <sub>carbonyl</sub> | -1.68                      |
|                                   | O <sub>alkoxy</sub> ...Li...O <sub>alkoxy</sub>     | -1.25                      |
|                                   | O <sub>carbonyl</sub> ...Li...O <sub>alkoxy</sub>   | -1.30                      |
| <b>DFOB</b>                       | O <sub>carbonyl</sub> ...Li...O <sub>carbonyl</sub> | -1.89                      |
|                                   | O <sub>carbonyl</sub> ...Li...O <sub>alkoxy</sub>   | -1.49                      |
|                                   | O <sub>alkoxy</sub> ...Li...F                       | -1.53                      |
|                                   | F...Li...F                                          | -1.58                      |

**Table S3.** Catalog of electrolytes decomposition reactions and the approximate time they occurred during AIMD simulations.

| Systems                     | Timepoint (fs)                                  | Reaction                                                                            |                   |
|-----------------------------|-------------------------------------------------|-------------------------------------------------------------------------------------|-------------------|
| <b>PEO:LiBF<sub>4</sub></b> | 5070, 5230, 6925, 10300,<br>11060, 11105, 12520 | 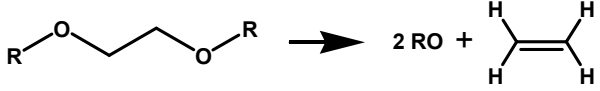  | PEO decomposition |
|                             | 1160                                            |   | Salt dimerization |
| <b>PEO:LiBOB</b>            | 2920, 8060                                      |  | Salt ring-opening |

---

5090

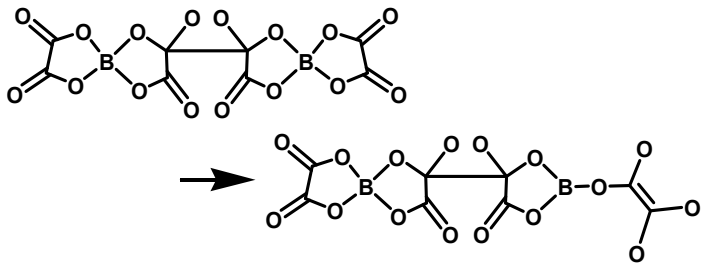

Salt ring-opening

---

7140

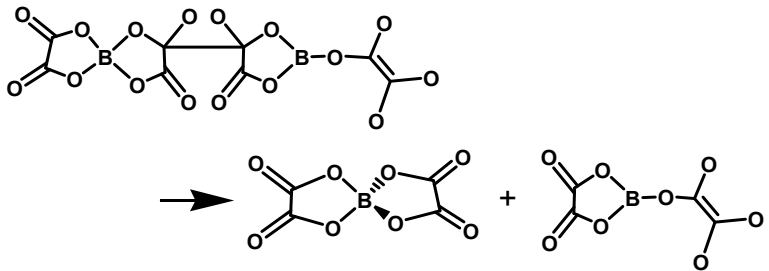

Salt dimer decomposition

**PEO:LiBOB**

8230

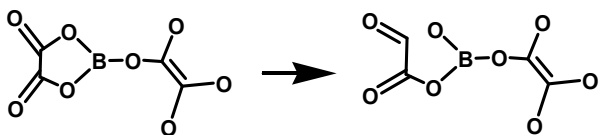

Salt ring-opening

---

|                   |             |  |                    |
|-------------------|-------------|--|--------------------|
|                   | 8730        |  | Salt ring-opening  |
|                   | 11030       |  | Salt decomposition |
| <b>PEO:LiBOB</b>  | 8100, 11030 |  | PEO decomposition  |
|                   | 1740, 11630 |  | Salt decomposition |
| <b>PEO:LiDFOB</b> | 2120        |  | Salt ring opening  |

|                   |                                         |  |                    |
|-------------------|-----------------------------------------|--|--------------------|
|                   | 11060                                   |  | Salt decomposition |
|                   | 11960                                   |  | Salt decomposition |
| <b>PEO:LiDFOB</b> | 5250, 7200, 8030, 8240,<br>11100, 11120 |  | PEO decomposition  |

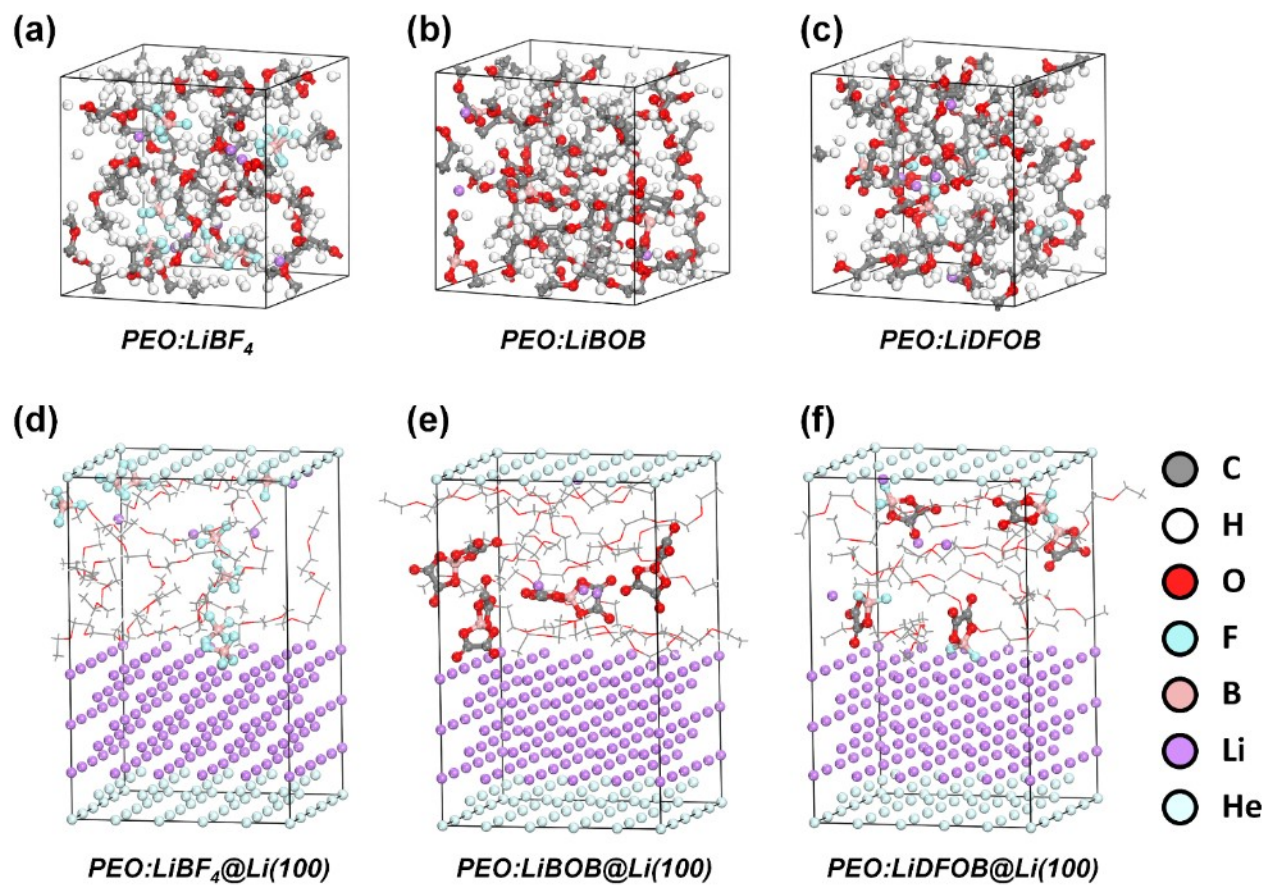

**Figure S1.** AIMD simulation box for (a) PEO:LiBF<sub>4</sub> (b) PEO:LiBOB, (c) PEO:LiDFOB electrolyte, and (d) PEO:LiBF<sub>4</sub> (e) PEO:LiBOB (f) PEO:LiDFOB electrolyte on the Li (100) surface.



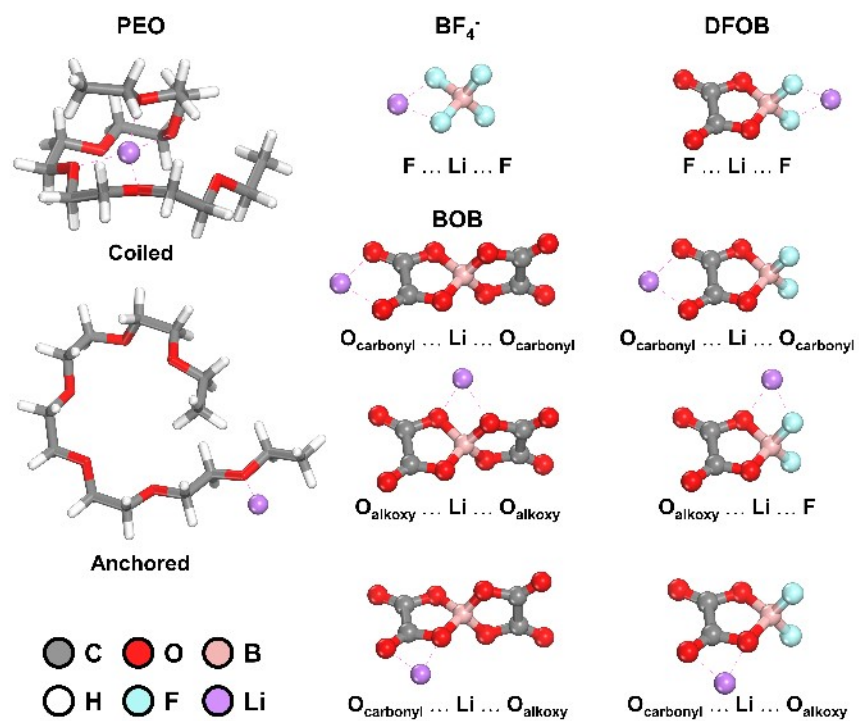

**Figure S2.** The optimized structures of  $\text{Li}^+$  binding with PEO chain,  $\text{BF}_4^-$ , BOB, and DFOB anions by different binding types

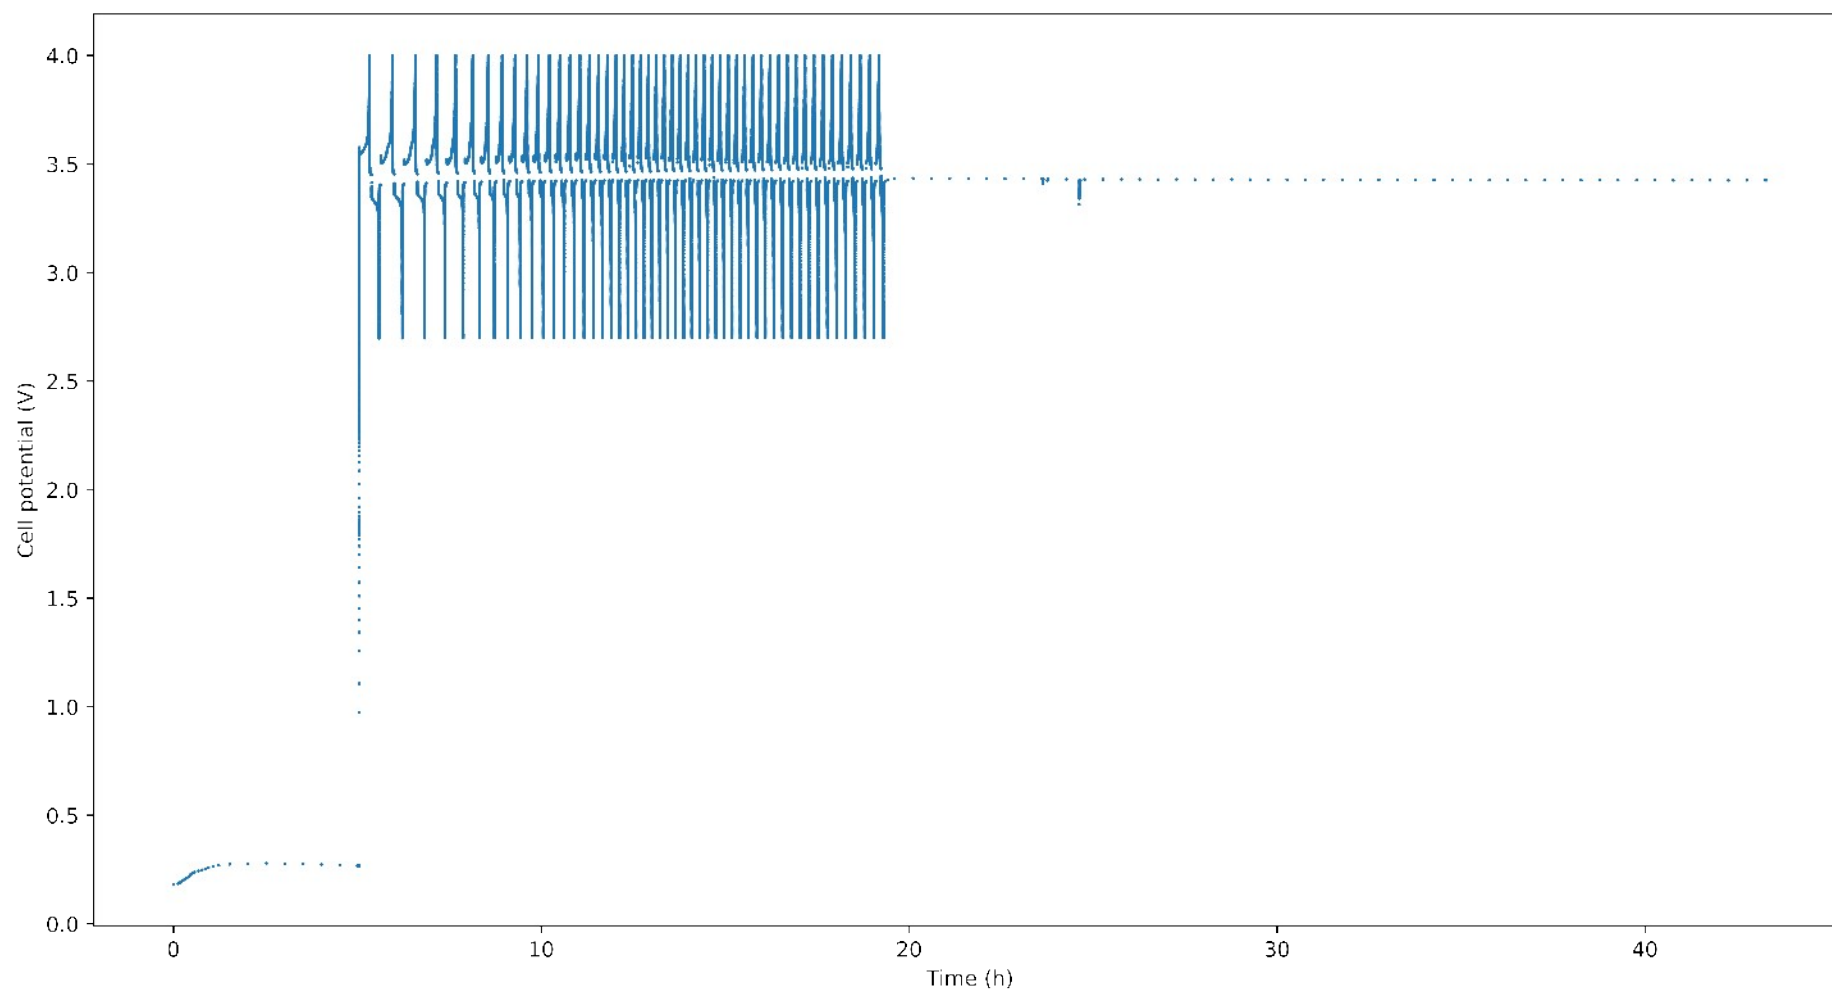

**Figure S3.** Cycling curves for PEO:LiBF<sub>4</sub> Cu vs. LFP cell.

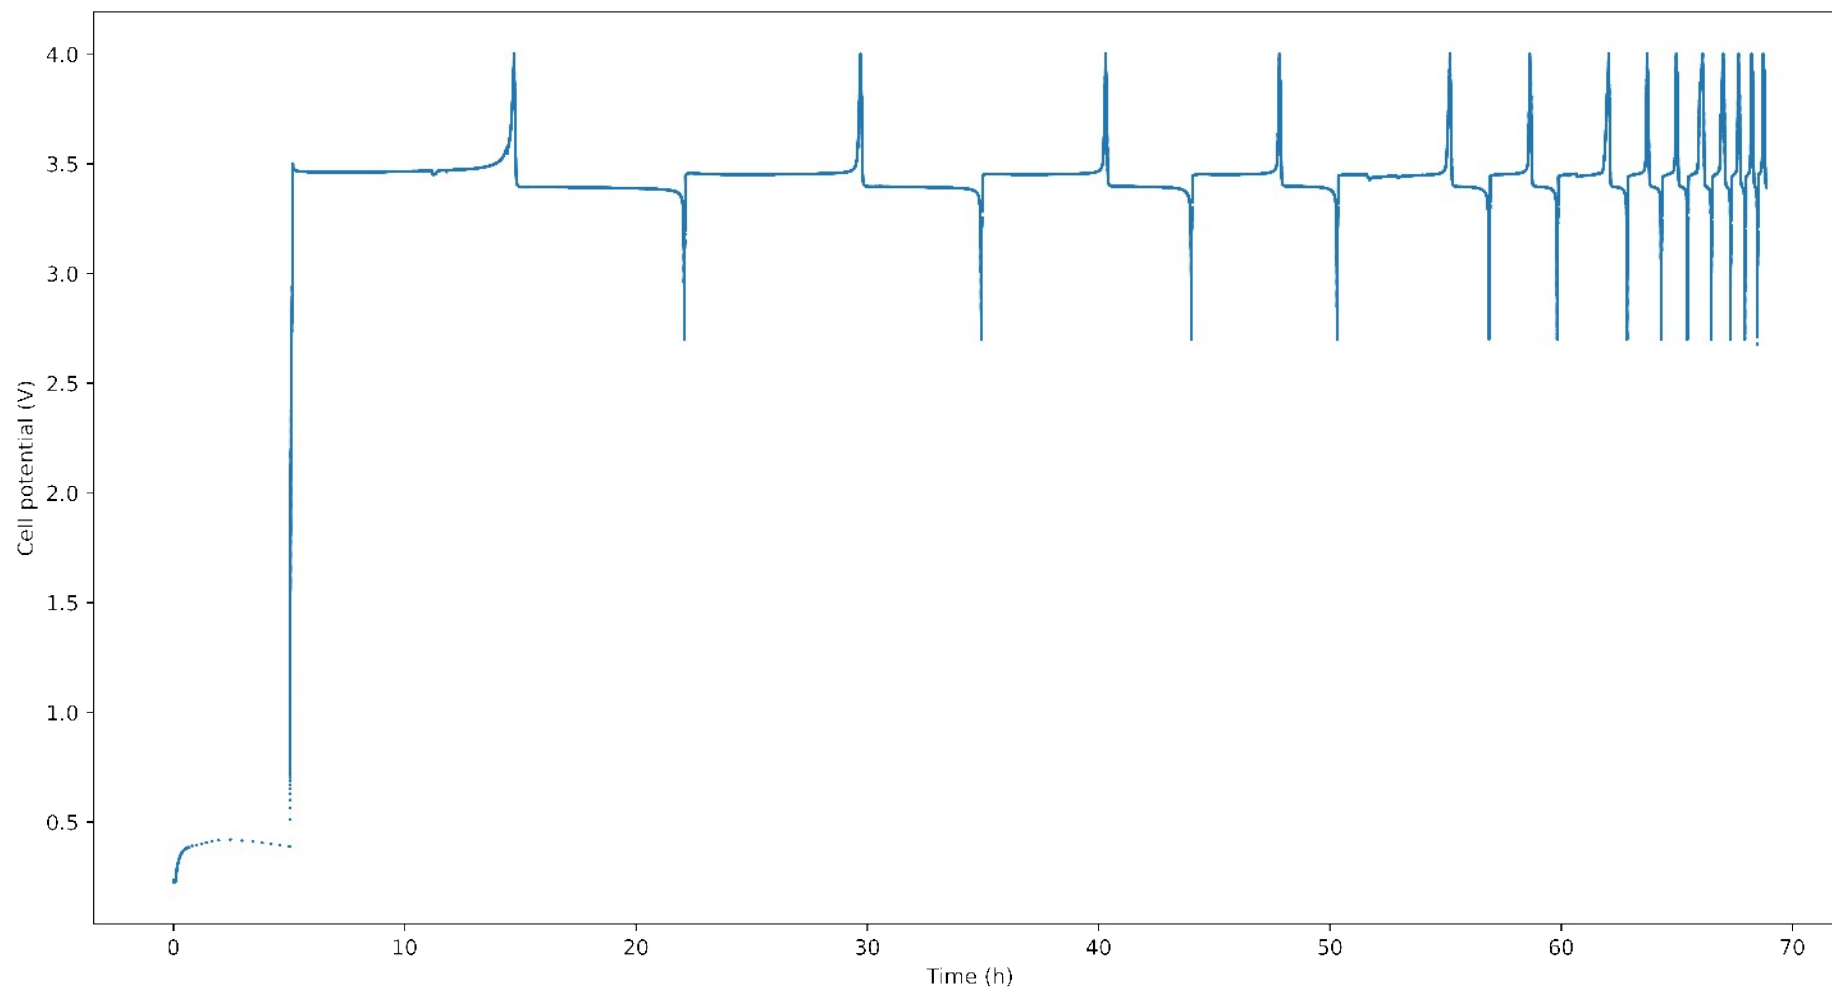

**Figure S4.** Cycling curves for PEO:LiBOB Cu vs. LFP cell.

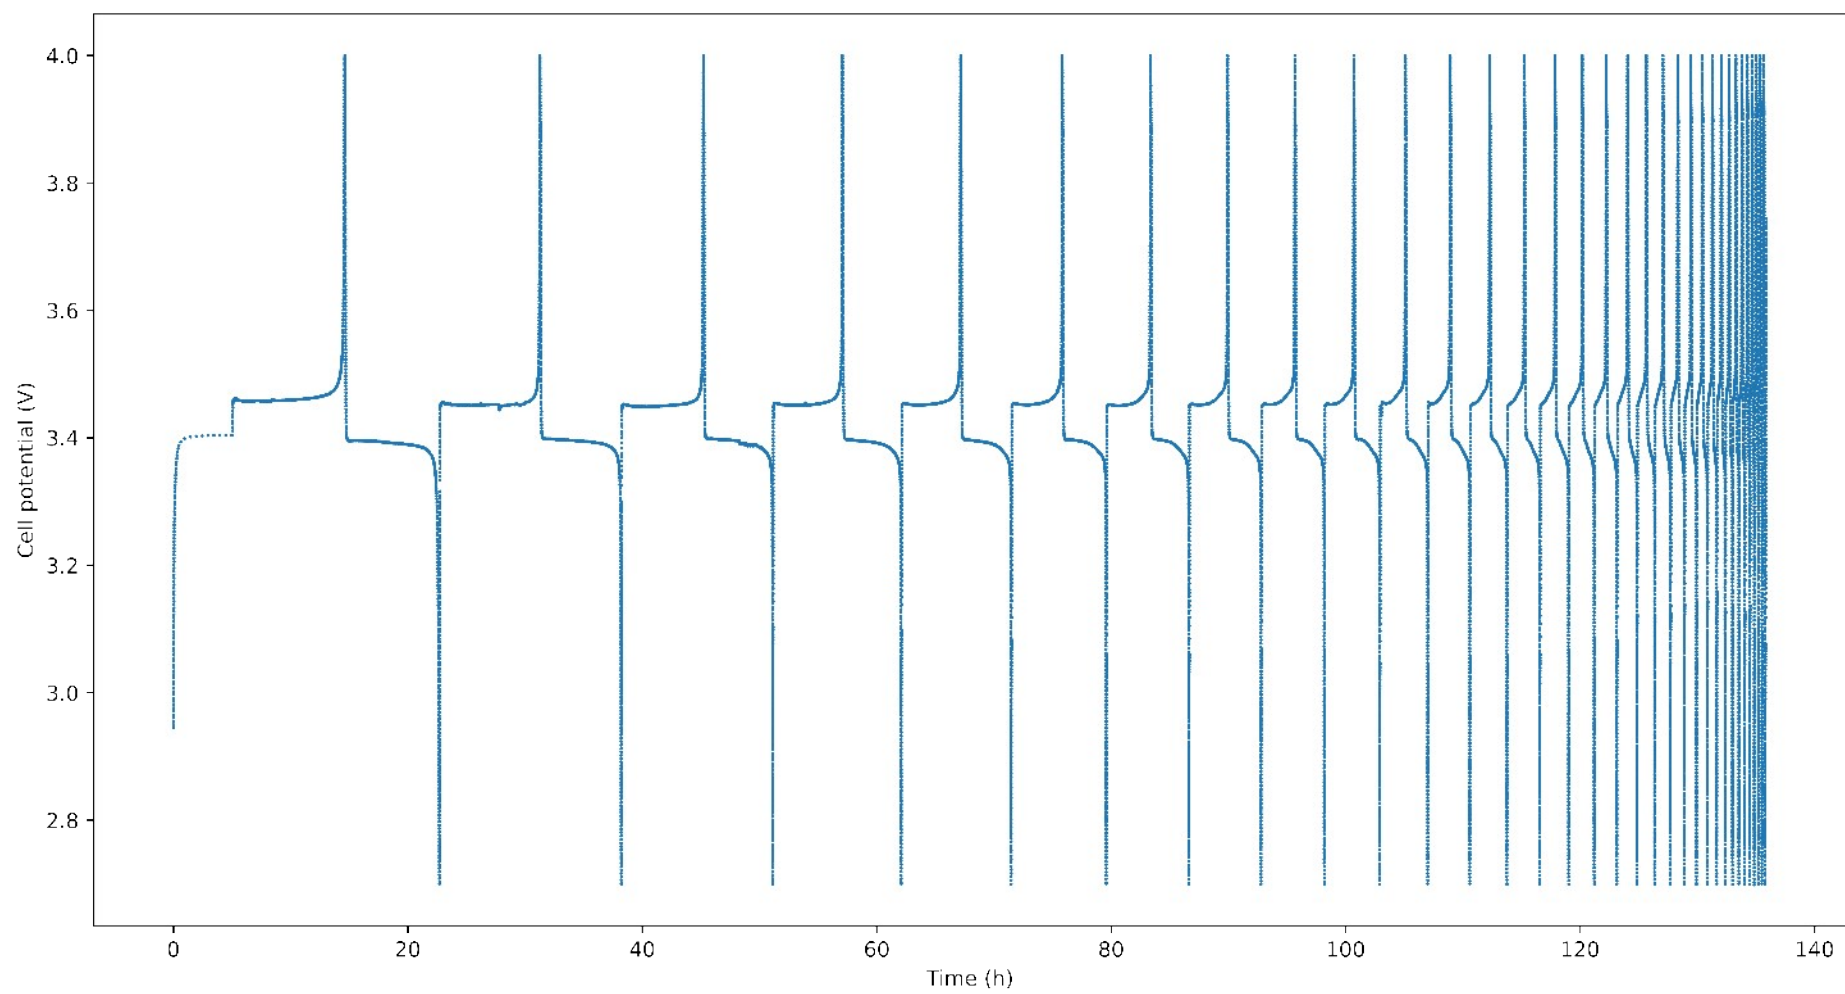

**Figure S5.** Cycling curves for PEO:LiDFOB Cu vs. LFP cell.

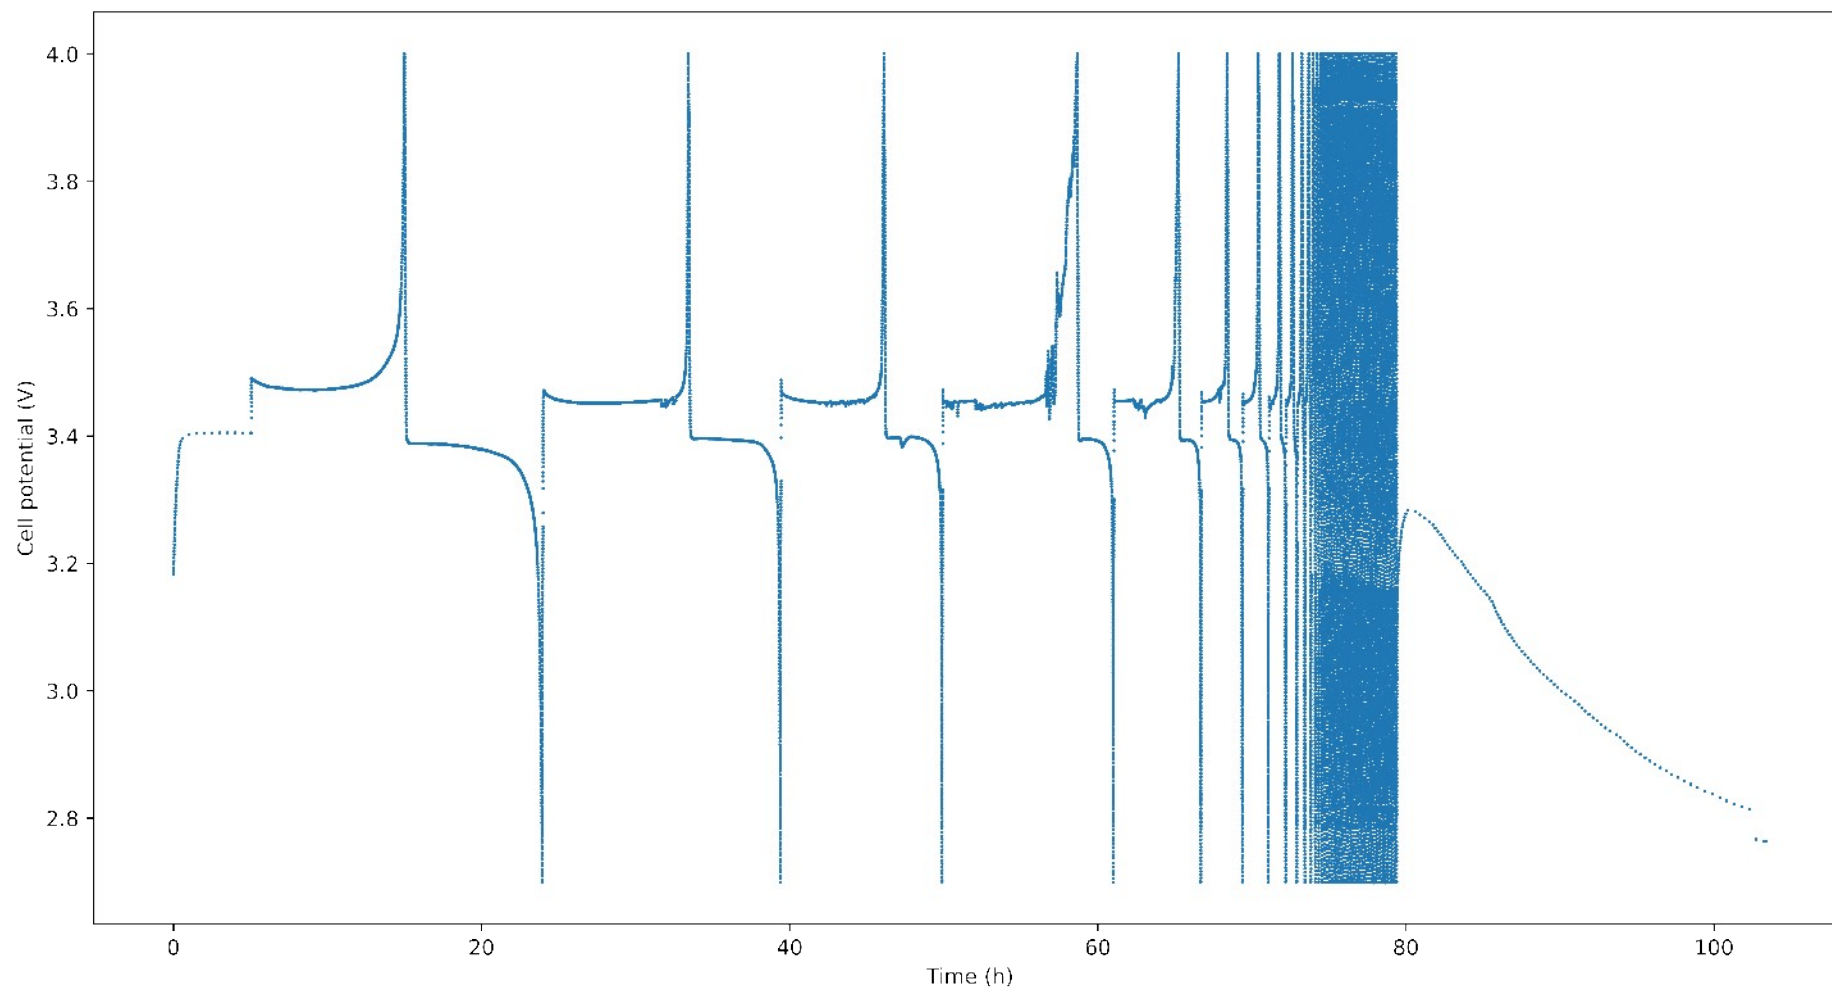

**Figure S6.** Cycling curves for PEO:LiTFSI Cu vs. LFP cell.

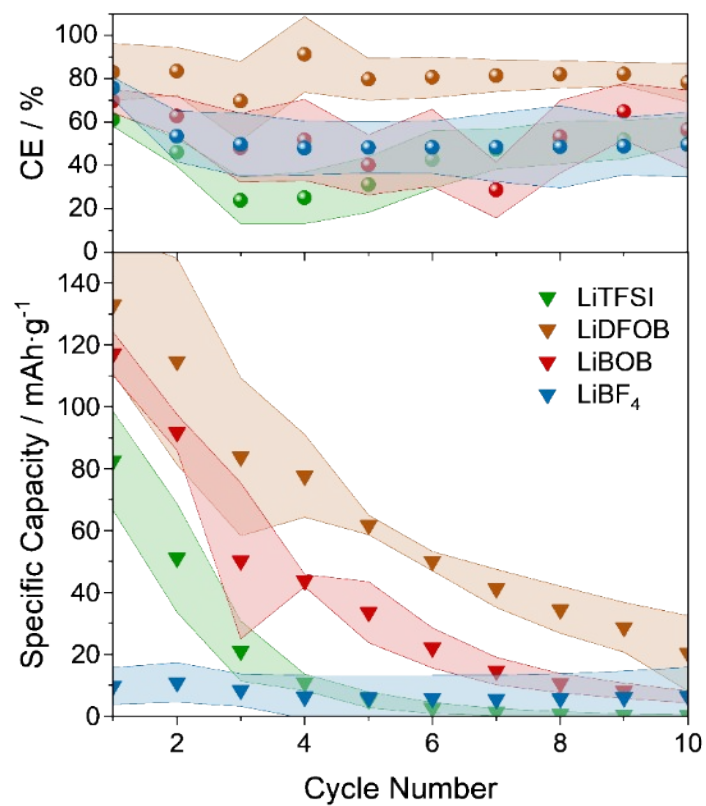

**Figure S7.** Coulombic efficiency and specific capacity of anode-less Cu vs. LFP full cells using either PEO:LiTFSI, PEO:LiBF<sub>4</sub>, PEO:LiBOB or PEOLiDFOB as the electrolyte.

**(a) SPE**

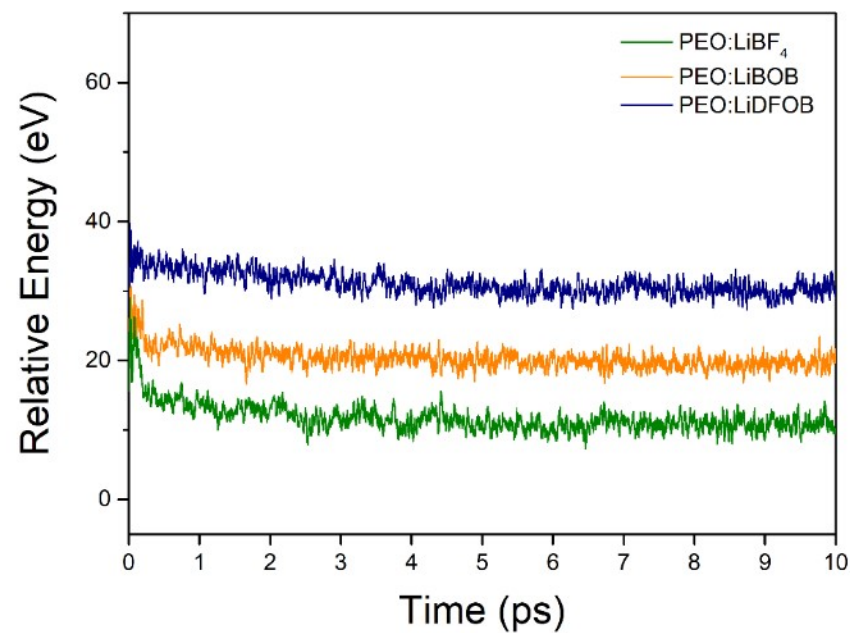

**(b) SPE@Li(100)**

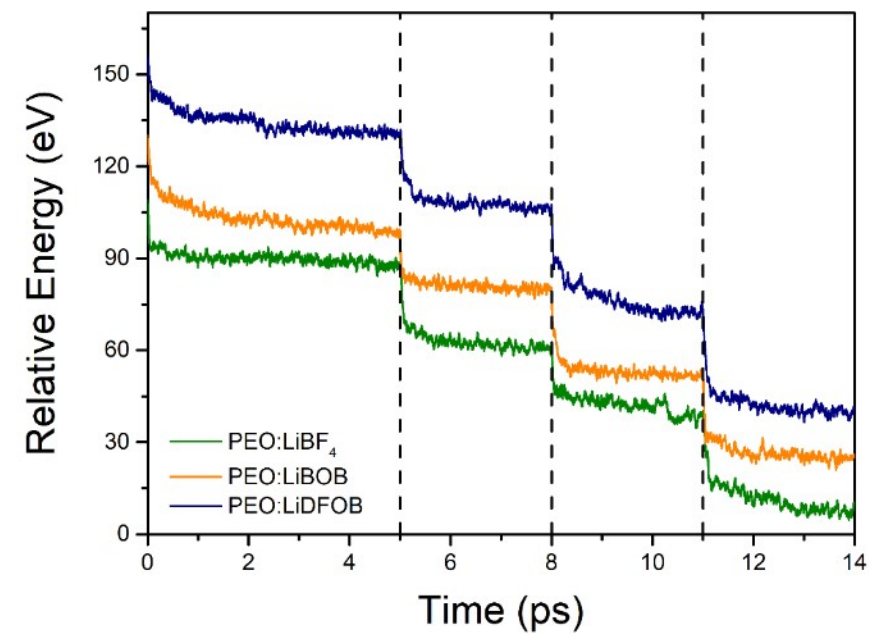

**Figure S8.** Energy fluctuations over the simulation time for (a) PEO:LiBF<sub>4</sub>, PEO:LiBOB, and PEO:LiDFOB electrolyte, and (b) the three SPEs on a Li (100) anode surface.

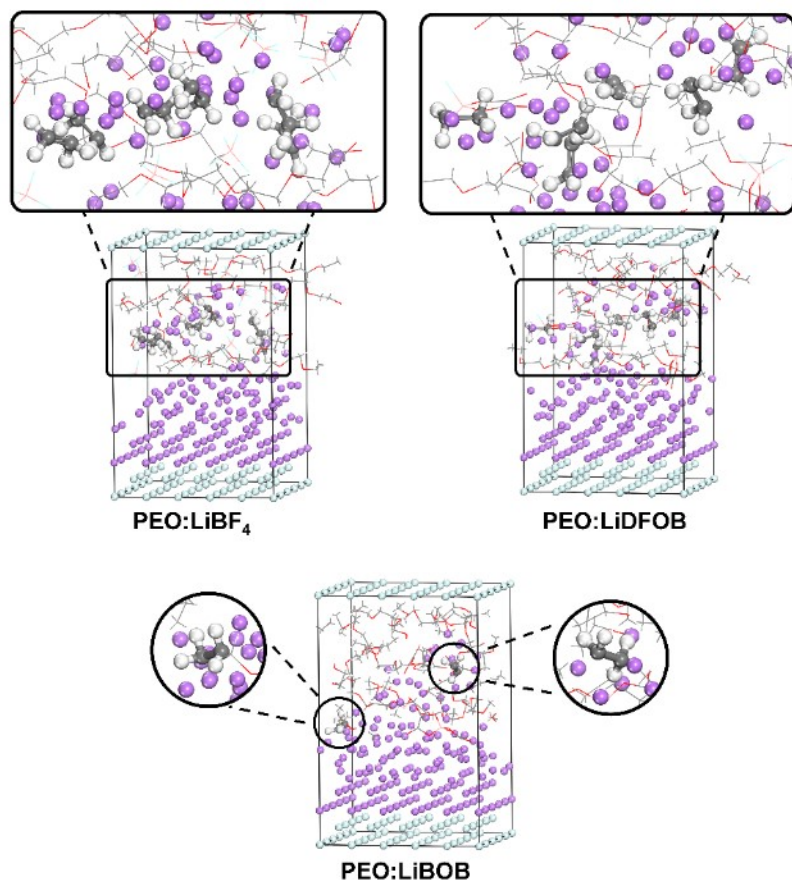

**Figure S9.** Final state of the three SPE systems at the Li interface, showing the formed Li ethylene complexes.



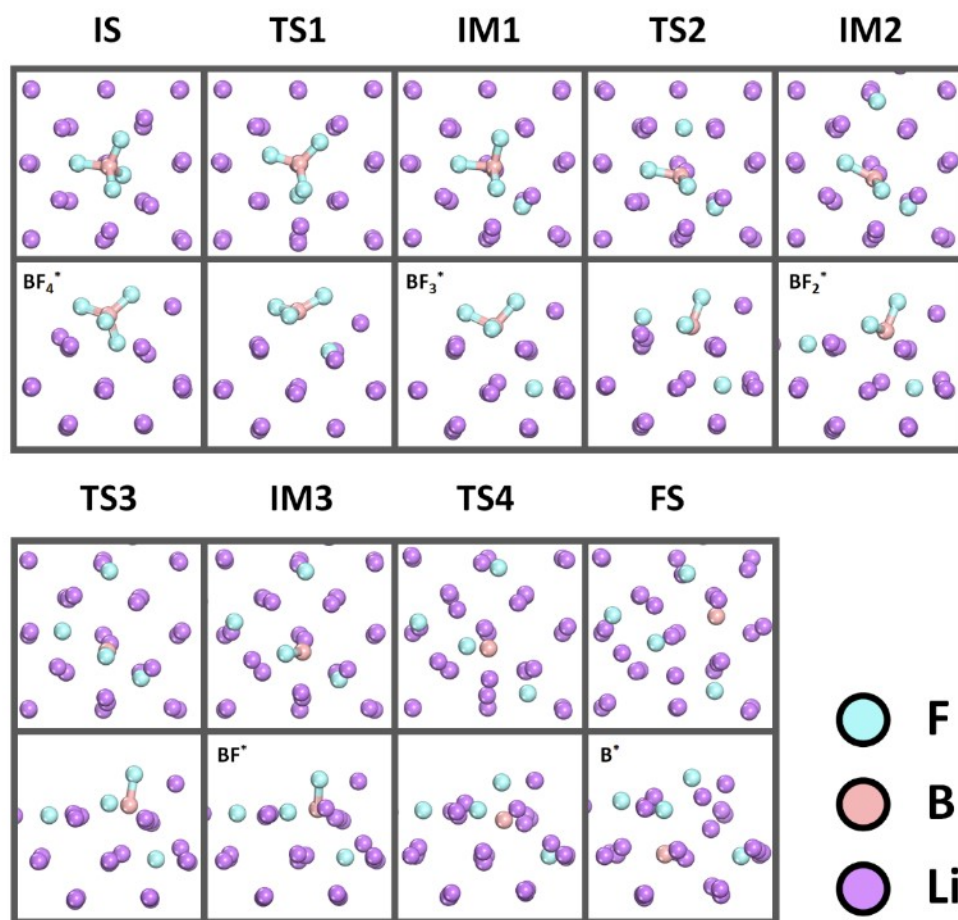

**Figure S10.** Top and side views of initial state (IS), intermediates (IM), transition states (TS), and final state (FS) for  $\text{BF}_4^*$  decomposition on the Li (100) surface.

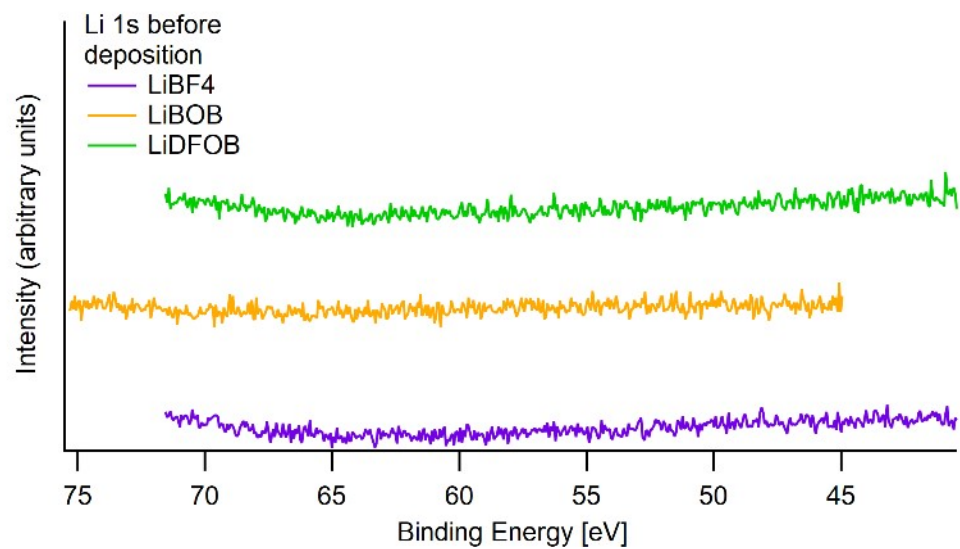

**Figure S11.** Li 1s spectra for PEO:LiBF<sub>4</sub>, PEO:LiBOB and PEO:LiDFOB before deposition.

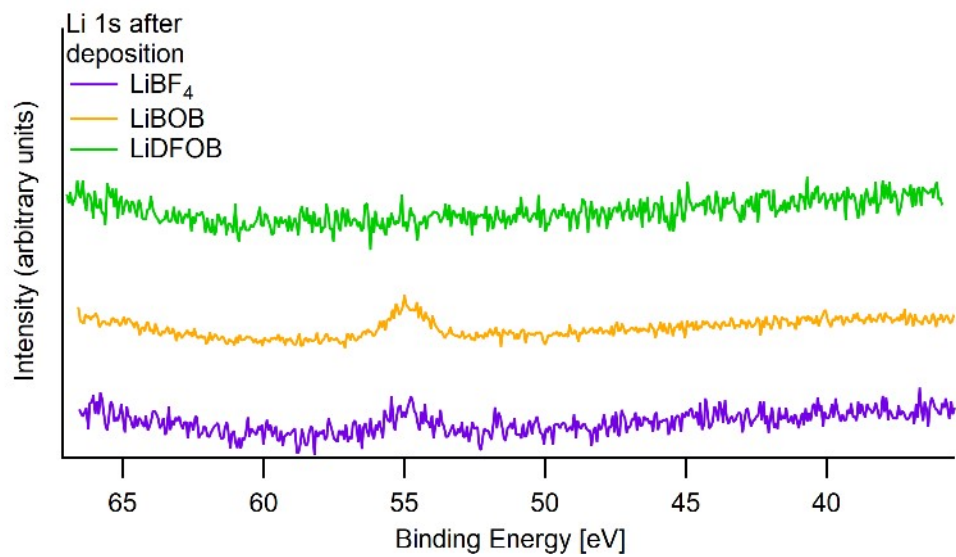

**Figure S12.** Li 1s spectra for PEO:LiBF<sub>4</sub>, PEO:LiBOB and PEO:LiDFOB after deposition.

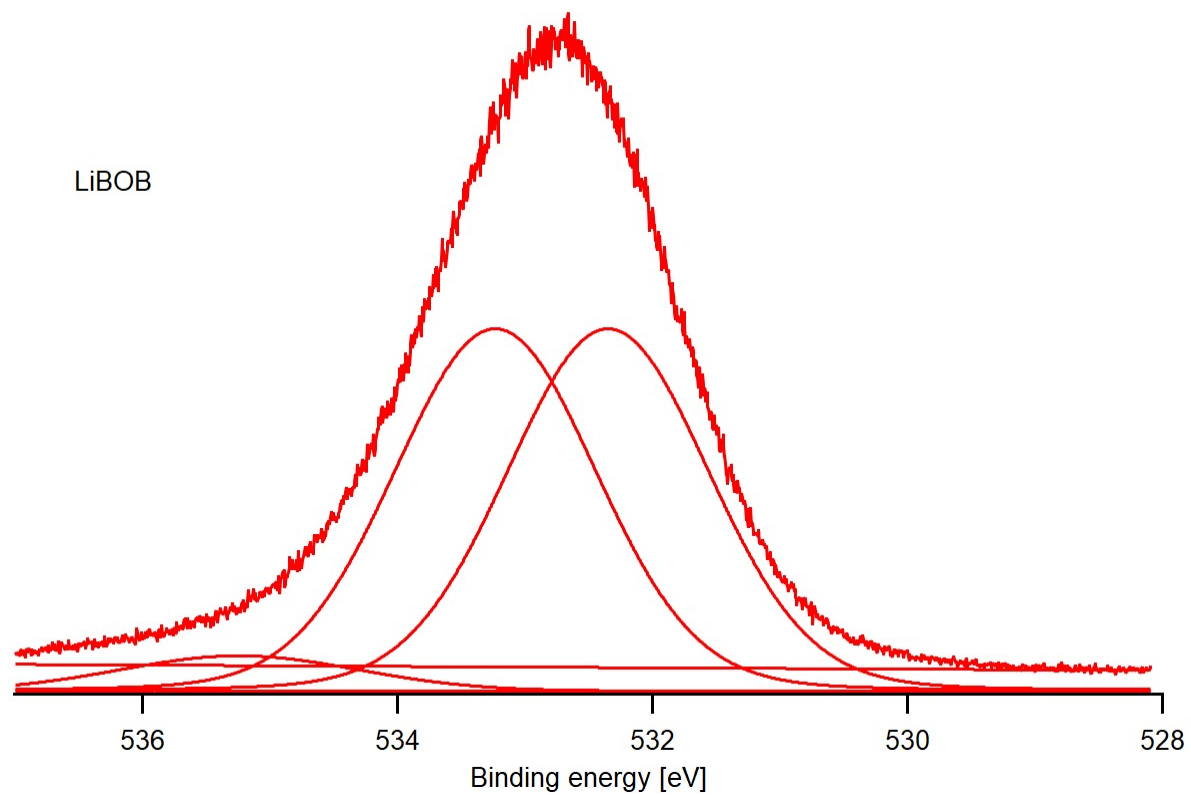

**Figure S13.** Reference spectrum of LiBOB salt.

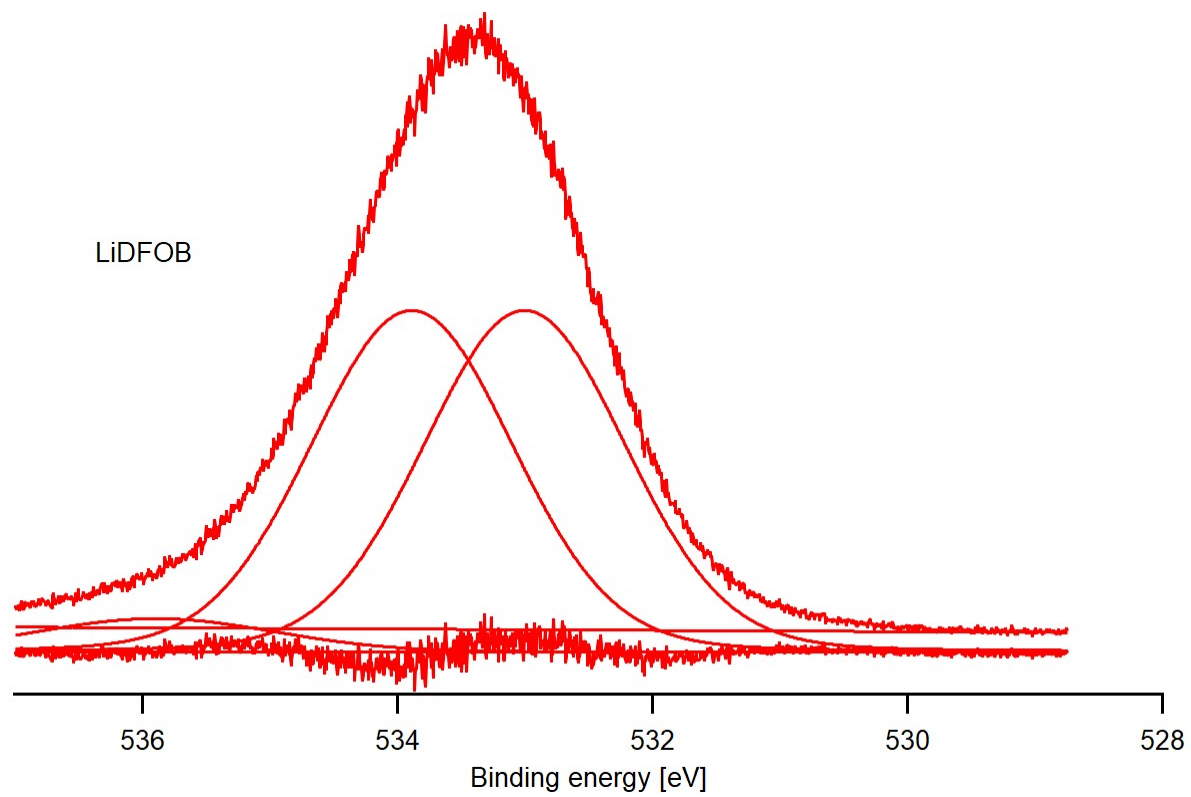

**Figure S14.** Reference spectrum of LiDFOB salt.
